# Supplementary material
Source: Research Square preprint supplement (doi:10.21203/rs.3.rs-9142249/v1)
Supplement: Supplementary file 1 [file 86a84227e1fdb33c2c4cc22b.docx]

**Drivers of Colorectal Cancer Screening in the Gaza Strip, Palestine Territory: A Qualitative Study**

Qualitative study participants were stakeholders from different levels, including individuals, families, communities, organisations, and policymakers, and was invited to participate in an in-depth interview. The questions are as follows:

|  | **Barriers/Challenges:** | | **Opportunities/Facilitators:** | |
| --- | --- | --- | --- | --- |
|  | Main | Probe | Main | Probe |
| 1. Individuals |  |  |  |  |
|  | In your experience, what personal reasons or challenges deter individuals from undergoing colorectal cancer screening? | Can you recall any specific instance when you or someone you know faced a major hurdle in seeking CRC screening? | What factors would encourage or motivate individuals to undergo CRC screening? | Have you encountered any positive stories or testimonials that influenced your or others’ perspective on CRC screening? |
|  | How do perceptions or fears related to CRC screening impact the decision to get tested? | Are there any misconceptions or myths you have heard regarding CRC screening? | In what ways do you think communication or awareness campaigns could be improved to ensure more people consider CRC screening? | Are there any sources of information or platforms you trust and recommend for CRC awareness? |
| 2. Families: |  |  |  |  |
|  | How does family dynamics or family history impact decisions related to CRC screening? | Are there specific family values or traditions that might act as barriers to CRC screening? | What role can families play in facilitating a supportive environment for members considering CRC screening? | Are there any practices or conversations within families that have positively influenced the decision to undergo CRC screening? |
|  | Can you identify any familial concerns or apprehensions that hinder family members from recommending or pursuing CRC screening? | How do family members react to the idea of undergoing a CRC screening? | How can families be better educated or informed about the benefits of CRC screening? | What resources or platforms would families trust the most for such information? |
| 3. Communities: |  |  |  |  |
|  | How do community beliefs, cultural practices, or local misconceptions influence individual decisions regarding CRC screening? | Are there any predominant myths within the community related to CRC screening? | How can community leaders or influencers promote a positive outlook towards CRC screening? | Are there any successful community-driven initiatives or campaigns you can point to that have effectively promoted CRC screening? |
|  | What community-level challenges or barriers deter individuals from seeking CRC screening? | Are there logistical or accessibility issues within the community that hinder CRC screening? | What community resources or platforms can be leveraged to enhance awareness and uptake of CRC screening? | How can community gatherings, local media, or educational institutions play a role in this? |
| 4. Organisations: |  |  |  |  |
|  | From an organisational standpoint, what challenges do you face in promoting or facilitating CRC screening for members or employees? | Are there logistical, financial, or infrastructural issues that the organisation grapples with regarding CRC screening? | How can organisations create a conducive environment for members or employees to prioritise CRC screening? | Probe: Are there any organisational initiatives, benefits, or policies you can highlight that successfully promote CRC screening? |
|  | How do organisational policies or workplace culture impact employees’ or members’ decisions related to CRC screening? | Are there any specific policies or workplace norms that might act as barriers to CRC screening? | What strategies or partnerships can organisations explore to enhance awareness and participation in CRC screening? | How can collaboration with healthcare providers or institutions aid in this endeavour? |
|  | In your experience, what specific strategies or interventions have effectively increased CRC screening uptake among underserved populations? | Can you share any successful case studies or examples where a particular approach significantly impacted CRC screening uptake within such communities? | What challenges or disparities have you observed that hinder CRCS uptake among underserved populations, and how do you address them? | Are there any existing community partnerships, resources, or initiatives that could be leveraged or expanded upon to address these disparities? |
| 5. Policymakers: |  |  |  |  |
|  | What policy-level challenges or barriers have you identified that might impact the promotion and uptake of CRC screening? | Are there any legislative or budgetary constraints that hinder a broader implementation of CRC screening programs? | What policy initiatives or changes can be introduced to facilitate a more widespread uptake of CRC screening? | Are there any successful policy models from other regions or countries that can be adapted or adopted? |
|  | How do national or regional healthcare policies influence the public’s perception and decision regarding CRC screening? | Are there any policy gaps or areas of improvement that you can identify related to CRC screening? | How can collaboration between policymakers, healthcare institutions, and communities enhance CRC screening rates? | Are there any existing collaborative models or partnerships that have yielded positive results in this regard? |
|  | In your experience, what specific strategies or interventions have effectively increased CRC screening uptake among underserved populations? | Can you share any successful case studies or examples where a particular approach significantly impacted CRC screening uptake within such communities? | What challenges or disparities have you observed that hinder CRC screening uptake among underserved populations, and how do you address them? | Are there any existing community partnerships, resources, or initiatives that could be leveraged or expanded upon to address these disparities? |

**Concluding question:** Is there anything else you’d like to share about your experiences or insights regarding colorectal cancer screening strategies. This is common question to all
